# Supplementary material for: Inferring late-Holocene climate in the Ecuadorian Andes using a chironomid-based temperature inference model
Source: Copernicus journal article supplement (doi:10.5194/cp-12-1263-2016), 2016-06-01
Supplement: Supplementary file 1 [file cp-12-1263-2016-supplement.zip]

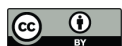

## *Supplement of*

# **Inferring late-Holocene climate in the Ecuadorian Andes using a chironomid-based temperature inference model**

**Frazer Matthews-Bird et al.**

*Correspondence to:* Frazer Matthews-Bird ([matthewsbirdf@fit.edu](mailto:matthewsbirdf@fit.edu))

- [cp-12-1263-2016-supplement-title-page.pdf](#)
- [Tropical Andean chironomid transfer function.xlsx](#)

The copyright of individual parts of the supplement might differ from the CC-BY 3.0 licence.
